# Supplementary material for: Discovery and characterization of the feline miRNAome
Source: PubMed Central journal article supplement (PMC5569061; doi:10.1038/s41598-017-10164-w), 2017-08-23
Supplement: 41598_2017_10164_MOESM1_ESM.pdf [file 41598_2017_10164_MOESM1_ESM.pdf]

## **Discovery and characterization of the feline miRNAome**

Alessandro Laganà, Wessel P. Dirksen, Wachiraphan Supsavhad, Ayse Selen Yilmaz, Hatice G. Ozer, James D. Feller, Kiersten A. Vala, Carlo M. Croce, and Thomas J. Rosol

### **SUPPLEMENTARY FIGURES**

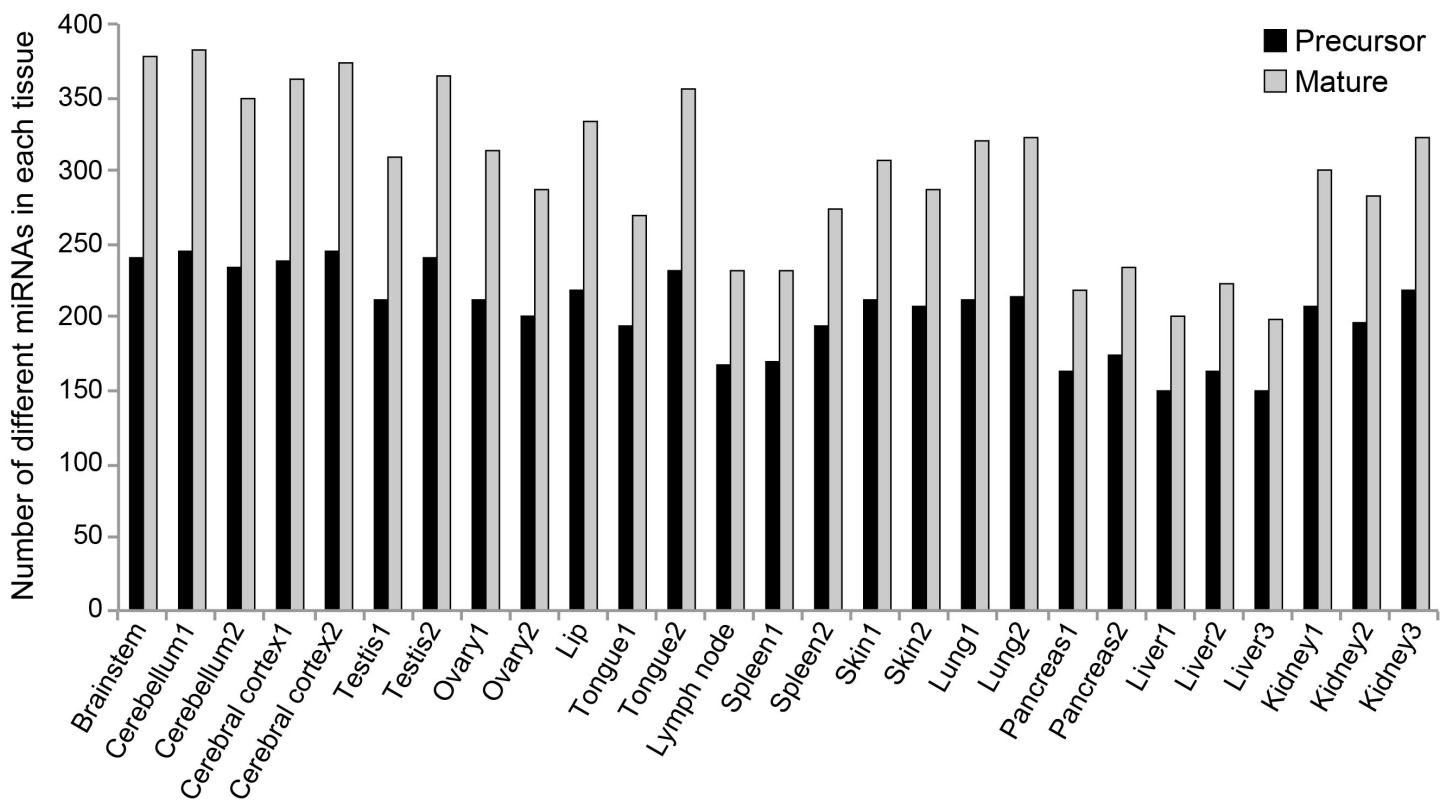

**Fig. S1-Distribution of miRNA precursors and mature sequences across the analyzed samples.**

Graph shows total number of precursor and mature miRNAs in each tissue. Most of the precursors generate more than one mature miRNA. Thus, the number of mature miRNAs is greater than the number precursors.
